# Supplementary material for: Local Food Environments, Suburban Development, and BMI: A Mixed Methods Study
Source: MDPI journal article supplement (doi:10.3390/ijerph15071392), 2018-07-02
Supplement: s1 [file s1]

Table S2: GEE models of associations between BMI and measures of supermarket access for urban PHS participants by established vs urban-growth area location

| BMI (kg/m²) *                      | Location |        |         |       |                            |        |         |       |                            |        |         |       |
|------------------------------------|----------|--------|---------|-------|----------------------------|--------|---------|-------|----------------------------|--------|---------|-------|
|                                    | Total    |        |         |       | Established LGA (n = 1406) |        |         |       | Growth area LGA (n = 1306) |        |         |       |
|                                    | β        | 95% CI | P value |       | β                          | 95% CI | P value |       | β                          | 95% CI | P value |       |
| <i>Supermarket density</i>         |          |        |         |       |                            |        |         |       |                            |        |         |       |
| <= 800m (pedestrian road network)  | -0.049   | -0.379 | 0.282   | 0.773 | 0.019                      | -0.424 | 0.461   | 0.933 | -0.162                     | -0.708 | 0.385   | 0.562 |
| <= 1000m (pedestrian road network) | -0.027   | -0.252 | 0.197   | 0.811 | -0.006                     | -0.198 | 0.184   | 0.944 | -0.034                     | -0.459 | 0.391   | 0.875 |
| <= 1600m (pedestrian road network) | 0.066    | -0.118 | 0.251   | 0.480 | 0.040                      | -0.212 | 0.293   | 0.753 | 0.106                      | -0.151 | 0.364   | 0.419 |
| <= 2000m (car road network)        | -0.097   | -0.242 | 0.049   | 0.194 | -0.021                     | -0.207 | 0.164   | 0.822 | -0.201                     | -0.427 | 0.024   | 0.080 |
| <= 3000m (car road network)        | 0.009    | -0.067 | 0.085   | 0.815 | 0.012                      | -0.052 | 0.075   | 0.719 | 0.017                      | -0.178 | 0.211   | 0.866 |
| <i>Supermarket proximity</i>       |          |        |         |       |                            |        |         |       |                            |        |         |       |
| (pedestrian road network) (km)     | -0.034   | -0.391 | 0.323   | 0.851 | 0.025                      | -0.260 | 0.310   | 0.863 | -0.042                     | -0.705 | 0.620   | 0.900 |

IRSD, Index of Relative Socio-economic Disadvantage; BMI= body mass index

\*Adjusted for age, gender, education level, income, vegetable intake, fruit intake, frequency of soft drink consumption, frequency of fast food consumption, physical activity, smoking, fast food chain access, IRSD and clustering at the LGA level
